# Supplementary material for: Altered microRNA expression in COVID-19 patients enables identification of SARS-CoV-2 infection
Source: PLoS Pathog. 2021 Jul 28;17(7):e1009759. doi: 10.1371/journal.ppat.1009759 (PMC8318295; doi:10.1371/journal.ppat.1009759)
Supplement: S5 Table — (XLSX) [file ppat.1009759.s009.xlsx]

## Sheet: Sheet1
MicroRNA	Log2 Fold Change	P-value	Adjusted P-value
hsa-miR-92a-3p	-3.40243	2.77e-51	8.32e-49
hsa-miR-486-5p	-4.56453	4e-50	6e-48
hsa-miR-30e-5p	2.22057	9.42e-31	9.42e-29
hsa-miR-423-5p	-2.49659	2.47e-30	1.86e-28
hsa-miR-141-3p	4.10224	2.6e-23	1.56e-21
hsa-miR-128-3p	-1.81219	2.07e-14	1.03e-12
hsa-miR-210-3p	4.14121	2.84e-14	1.22e-12
hsa-miR-1-3p	4.03527	1.15e-13	4.33e-12
hsa-miR-500a-3p	2.38772	2.64e-11	8.8e-10
hsa-let-7b-5p	-1.33777	1.59e-10	4.35e-09
hsa-miR-22-3p	2.43437	1.5e-10	4.35e-09
hsa-miR-3661	18.4755	2.1e-10	5.25e-09
hsa-miR-24-3p	1.73633	3.73e-10	8.61e-09
hsa-miR-340-5p	3.63307	7.96e-10	1.71e-08
hsa-miR-574-5p	3.12542	2.53e-09	5.06e-08
hsa-let-7e-5p	2.63601	4.96e-09	9.29e-08
hsa-miR-378c	3.64863	5.47e-09	9.65e-08
hsa-miR-221-3p	1.59203	7.81e-09	1.3e-07
hsa-miR-181c-3p	4.13201	8.35e-09	1.32e-07
hsa-miR-30a-5p	2.00732	1.96e-08	2.94e-07
hsa-miR-130a-3p	4.15204	2.72e-08	3.89e-07
hsa-miR-1306-3p	-1.94074	5.95e-08	8.11e-07
hsa-miR-95-3p	2.57098	7.48e-08	9.76e-07
hsa-miR-146a-5p	1.37814	1.09e-07	1.36e-06
hsa-miR-195-5p	3.62619	1.23e-07	1.48e-06
hsa-miR-27b-3p	1.18862	1.82e-07	2.1e-06
hsa-miR-425-5p	-1.38106	2.67e-07	2.97e-06
hsa-miR-9-5p	-7.20819	2.97e-07	3.18e-06
hsa-miR-30a-3p	4.16575	6.49e-07	6.71e-06
hsa-miR-4454	2.63381	9.61e-07	9.61e-06
hsa-miR-148b-3p	-1.48248	1.18e-06	1.14e-05
hsa-miR-599	4.23639	1.5e-06	1.4e-05
hsa-miR-379-5p	4.44262	2.48e-06	2.25e-05
hsa-miR-142-5p	1.20937	2.78e-06	2.45e-05
hsa-miR-451a	-1.97605	4.74e-06	3.95e-05
hsa-miR-191-3p	2.16353	4.7e-06	3.95e-05
hsa-miR-223-5p	2.23628	6.54e-06	5.3e-05
hsa-miR-196b-5p	2.1222	1.08e-05	8.54e-05
hsa-miR-194-5p	1.51752	1.13e-05	8.69e-05
hsa-let-7d-5p	1.56659	2.2e-05	0.000165
hsa-miR-324-3p	-1.88195	3.07e-05	0.000219
hsa-miR-186-5p	-1.12431	3e-05	0.000219
hsa-miR-502-3p	1.62542	3.37e-05	0.000235
hsa-miR-423-3p	-1.28775	6.88e-05	0.000463
hsa-miR-151b	3.2464	6.94e-05	0.000463
hsa-miR-760	1.67252	8.44e-05	0.00055
hsa-miR-93-3p	-2.0878	8.93e-05	0.00057
hsa-miR-382-5p	4.32911	0.000131	0.000818
hsa-miR-25-3p	-1.17445	0.000143	0.000877
hsa-miR-331-3p	3.14044	0.000175	0.001048
hsa-miR-29c-3p	-1.31867	0.000212	0.001247
hsa-miR-320a-3p	0.83899	0.00023	0.001328
hsa-miR-1277-5p	3.84418	0.000264	0.001494
hsa-miR-320d	1.45854	0.000344	0.001913
hsa-miR-769-5p	-1.67987	0.000359	0.001961
hsa-miR-320c	1.21562	0.000399	0.002136
hsa-miR-3064-5p	3.44712	0.000416	0.00219
hsa-miR-197-3p	-1.90611	0.000436	0.002258
hsa-miR-6529-5p	1.0355	0.00052	0.002644
hsa-miR-146b-5p	1.77947	0.000568	0.002841
hsa-miR-151a-3p	0.94682	0.000617	0.003035
hsa-miR-378a-5p	2.3225	0.00063	0.00305
hsa-miR-18a-3p	-3.53688	0.000659	0.003137
hsa-miR-27a-3p	1.29203	0.000791	0.003709
hsa-miR-503-5p	-1.58755	0.000911	0.004206
hsa-miR-192-5p	1.62473	0.000982	0.004465
hsa-miR-10a-3p	3.55258	0.001061	0.00475
hsa-miR-147b-3p	2.60586	0.001262	0.005566
hsa-miR-182-5p	2.35572	0.00142	0.006173
hsa-miR-409-3p	3.70209	0.00147	0.0063
hsa-miR-885-3p	3.28422	0.001508	0.006372
hsa-miR-450b-5p	-3.14202	0.001579	0.006487
hsa-miR-106b-3p	-1.19454	0.001564	0.006487
hsa-miR-215-5p	1.11843	0.001663	0.006744
hsa-miR-125a-3p	3.88496	0.001698	0.006794
hsa-miR-542-3p	2.47966	0.001726	0.006812
hsa-miR-30d-5p	0.556115	0.001796	0.006997
hsa-miR-432-5p	2.87264	0.001856	0.007137
hsa-miR-342-3p	-1.13623	0.001999	0.007592
hsa-let-7f-5p	0.705477	0.00208	0.0078
hsa-miR-200a-3p	1.69797	0.002144	0.007942
hsa-miR-30e-3p	2.55368	0.002823	0.010328
hsa-miR-21-3p	3.81853	0.003966	0.014335
hsa-miR-1843	2.78656	0.004319	0.015426
hsa-miR-150-5p	-1.59146	0.005053	0.017835
hsa-miR-320b	0.883137	0.00622	0.021696
hsa-miR-26b-3p	2.49984	0.006974	0.024047
hsa-miR-26b-5p	0.892899	0.007316	0.02494
hsa-miR-499a-5p	2.11851	0.007585	0.025566
hsa-miR-200b-5p	3.43062	0.008099	0.026997
hsa-miR-125b-1-3p	3.56792	0.008649	0.028515
hsa-miR-10b-5p	-1.33314	0.00912	0.029738
hsa-miR-219a-1-3p	3.59419	0.010575	0.034112
hsa-miR-885-5p	3.72307	0.011075	0.035346
hsa-miR-574-3p	1.95817	0.011467	0.036212
hsa-miR-15b-3p	-1.17185	0.012126	0.037894
hsa-miR-449a	-7.85645	0.012722	0.038944
hsa-let-7b-3p	3.19918	0.012693	0.038944
hsa-miR-32-5p	2.42476	0.013387	0.040567
hsa-miR-339-5p	0.562952	0.014345	0.042639
hsa-miR-130b-3p	0.975159	0.014355	0.042639
hsa-miR-2114-5p	-4.79594	0.016771	0.048848
hsa-miR-19a-3p	1.14289	0.016749	0.048848
